# Supplementary material for: ZnT2 Is Critical for TLR4-Mediated Cytokine Expression in Colonocytes and Modulates Mucosal Inflammation in Mice
Source: MDPI journal article supplement (doi:10.3390/ijms231911467), 2022-09-28
Supplement: s1 [file s1]

Supplementary Figure S1. Colonization of *Citrobacter rodentium* cultured from fecal extracts of mice.

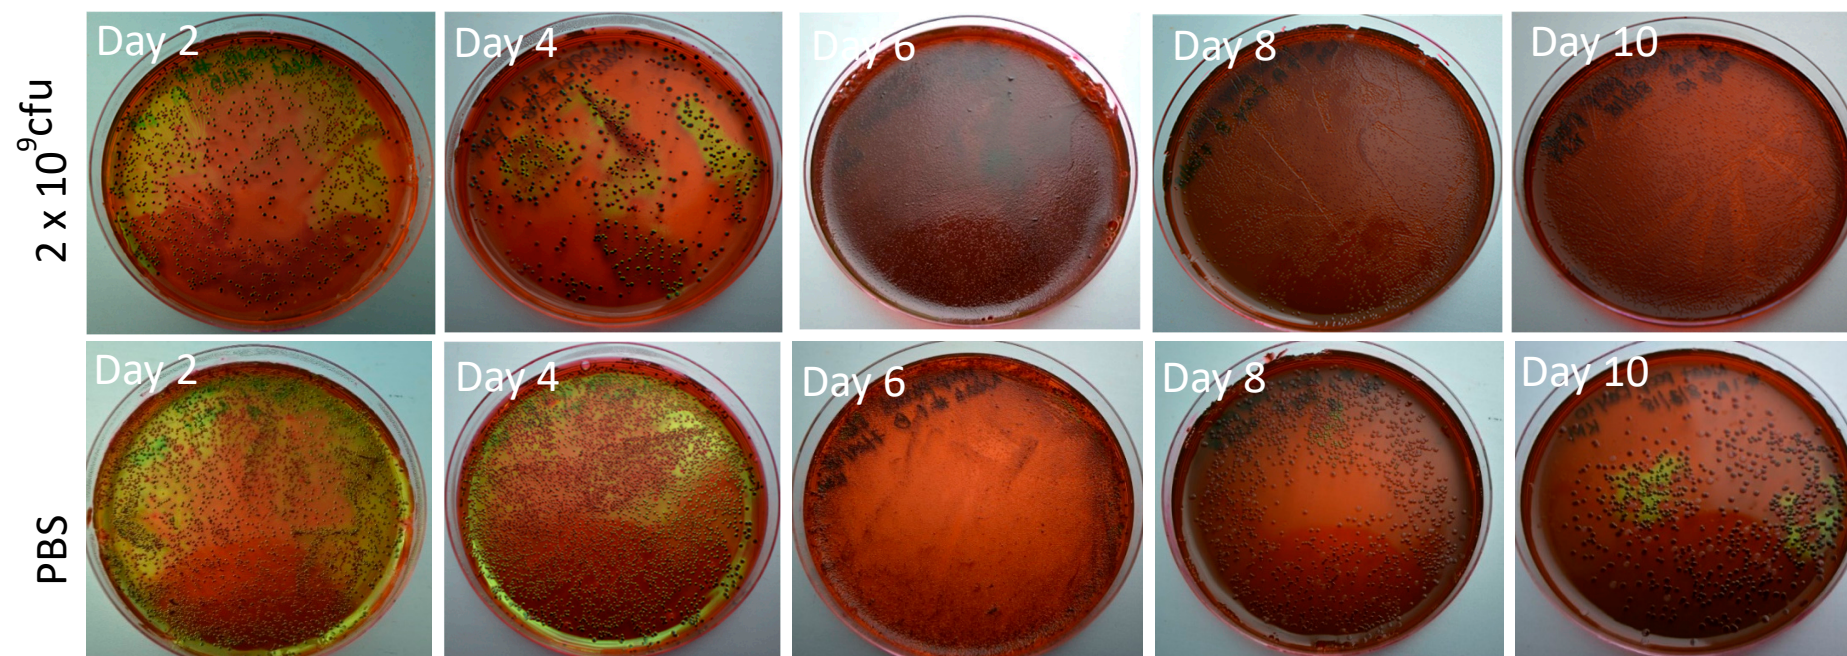

Mice were fasted for 8 hours and gavaged with either *Citrobacter rodentium* or PBS (in 200  $\mu$ L). Fresh fecal pellets were collected in a sterile microfuge tube and PBS was added to a final concentration of 50 mg/mL. Feces were vortexed to emulsify and serially plated onto EMB agar and cultured for 24 h at 37C. The density of bacterial growth was compared across time to ensure infection (*E.coli* appears metallic green, while *C. rodentium* appears as tiny dusky pink colonies). Note the robust colonization by Day 6 in infected mice.
